# Supplementary material for: AIE -active TPA modified Schiff base for successive sensing of Cu2+ and His via an on–off–on method and its application in bioimaging
Source: Royal Society of Chemistry journal article supplement (doi:10.1039/d2dt03457c), 2022-12-05
Supplement: d2dt03457c1.pdf [file d2dt03457c1.pdf]

## Supporting Information

### **AIE-active TPA modified Schiff base for successive sensing of Cu<sup>2+</sup> and His via on-off-on method and its application in bioimaging**

Dan Wang,<sup>\*a</sup> Tian-Fen Shao,<sup>a</sup> Wei-Hua Ding,<sup>b</sup> Shao-Jie Li,<sup>a</sup> Qi Yao,<sup>a</sup> Wei Cao,<sup>c</sup>  
Zheng Wang<sup>a</sup> and Yangmin Ma<sup>a</sup>

<sup>a</sup> *Key Laboratory of Chemical Additives for China National Light Industry, College of Chemistry and Chemical Engineering, Shaanxi University of Science & Technology, Xi'an 710021, People's Republic of China.*

<sup>b</sup> *Medical School, Institute of Reproductive Medicine, Nantong University, Nantong, Jiangsu 226001, People's Republic of China.*

<sup>c</sup> *Scientific Instrument Center, Shanxi University, Taiyuan 030006, People's Republic of China.*

**Corresponding author:**

E-mail address:

[wangdan0919@163.com](mailto:wangdan0919@163.com) (D. Wang)

## 1. Materials and Apparatus

All reagents were purchased from Energy Chemical or Macklin Biochemical Co., Ltd., and were used directly as received. Tetrahydrofuran (THF) used for spectral determination was of HPLC grade, other reagents were of analytical grade. The solutions of metal ions were prepared from  $\text{Al}(\text{ClO}_4)_3 \cdot 9\text{H}_2\text{O}$ ,  $\text{CaCl}_2$ ,  $\text{Cd}(\text{ClO}_4)_2 \cdot \text{H}_2\text{O}$ ,  $\text{Co}(\text{ClO}_4)_2 \cdot 6\text{H}_2\text{O}$ ,  $\text{CrCl}_3 \cdot 6\text{H}_2\text{O}$ ,  $\text{FeCl}_3 \cdot 6\text{H}_2\text{O}$ ,  $\text{KCl}$ ,  $\text{LiCl}$ ,  $\text{MgCl}_2 \cdot 6\text{H}_2\text{O}$ ,  $\text{Mn}(\text{ClO}_4)_2 \cdot 6\text{H}_2\text{O}$ ,  $\text{NaCl}$ ,  $\text{Ni}(\text{ClO}_4)_2 \cdot 6\text{H}_2\text{O}$ ,  $\text{Zn}(\text{ClO}_4)_2 \cdot 6\text{H}_2\text{O}$ ,  $\text{Pb}(\text{ClO}_4)_2 \cdot 3\text{H}_2\text{O}$ ,  $\text{FeCl}_2$ ,  $\text{HgCl}_2$ ,  $\text{Hg}_2(\text{NO}_3)_2 \cdot 2\text{H}_2\text{O}$ ,  $\text{Cu}(\text{Ac})_2$ ,  $\text{Cu}(\text{ClO}_4)_2 \cdot 6\text{H}_2\text{O}$ ,  $\text{Cu}(\text{NO}_3)_2 \cdot 3\text{H}_2\text{O}$  and  $\text{CuCl}_2 \cdot 2\text{H}_2\text{O}$ .  $^1\text{H}$  NMR and  $^{13}\text{C}$  NMR spectra were acquired on a Bruker Ascend 400 (400 MHz) spectrometer. FT-IR spectra were obtained on a Bruker INVENIO Fourier transform infrared spectrometer using KBr pellets. ESI-HRMS were acquired on a Thermo Fisher Q Exactive mass spectrometer with an ESI interface. Fluorescence spectra were measured by a Thermo Scientific Lumina fluorescence spectrophotometer, with a quartz cuvette (path length = 1 cm). UV-Vis absorption spectra were recorded on an UV-2600 spectrophotometer. pH values were determined on a PHS-3E pH meter. Dynamic light scattering (DLS) data were obtained using a Zetasizer Nano ZS90 laser particle size and zeta potential analyzer (Malvern). Scanning electron microscope (SEM) measurements were performed on a Hitachi SU8100 SEM. Confocal fluorescence imaging was carried out on a Leica TCS SP2 Laser Confocal Microscope.

## 2. Preparation of compounds 2 and 3

N-(4-Nitrophenyl)-N,N-diphenylamine (2) and N-(4-aminophenyl)-N,N-diphenylamine (3) were prepared according to the reported literature<sup>1, 2</sup>. As shown in Scheme S1, compound 2 was synthesized by the reaction of diphenylamine with 4-fluoronitrobenzene in the presence of sodium hydride. The brown crude product was recrystallized in isopropanol to give pure compound 2 in a yield of 85% (1.2338 g).  $^1\text{H}$  NMR (400 MHz,  $\text{DMSO}-d_6$ )  $\delta$  8.10 (d,  $J = 8.0$  Hz, 2H), 7.49 (t,  $J = 8.0$  Hz, 4H), 7.31 (m, 6H), 6.84 (d,  $J = 8.0$  Hz, 2H) ppm. Compound 3 was synthesized by Pd/C-catalyzed reduction of compound 2. The raw product was recrystallized in ethanol to give pure compound 3 in a yield of 91% (0.2369 g).  $^1\text{H}$  NMR (400 MHz,  $\text{DMSO}-d_6$ )  $\delta$  7.23 (t,  $J = 8.0$  Hz, 4H), 6.92 (m, 6H), 6.83 (d,  $J = 8.0$  Hz, 2H), 6.60 (d,  $J = 8.0$  Hz, 2H), 5.07 (s, 2H) ppm. The  $^1\text{H}$  NMR data of compounds 2 and 3 are in agreement the published data<sup>1, 2</sup>.

### 3. Theoretical calculation methods

All calculations were carried out with the Gaussian 09 software<sup>3</sup>. The PBE0 functional<sup>4</sup> and the def2-SVP basis sets<sup>5, 6</sup> were adopted for geometry optimization calculations. The DFT-D3 with BJ-damping<sup>7</sup> was applied to correct the weak interaction to improve the calculation accuracy. The SMD implicit solvation model<sup>8</sup> was used to account for the solvation effect of water. Orbital energy level analysis was performed by Multiwfn software<sup>9</sup>. The visualization of the orbitals for **HL** and **CuL<sub>2</sub>** complex were achieved using VMD<sup>10</sup> software. The excited states are calculated with linear response time-dependent DFT (TD-DFT) at the optimized ground state geometry. TD-DFT calculation was performed with PBE0 functional and the TZVP basis set<sup>11, 12</sup>.

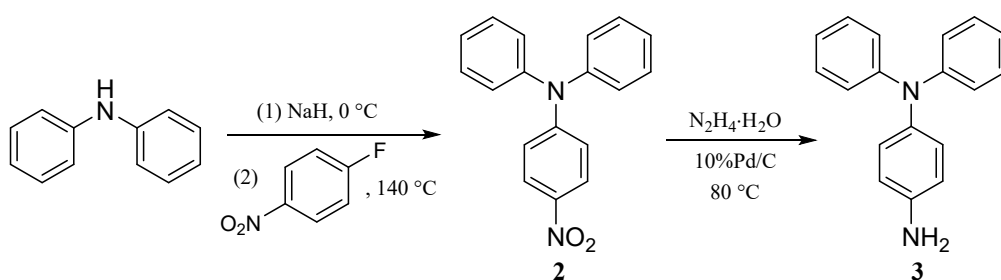

**Scheme S1** The synthetic route for compound 3.

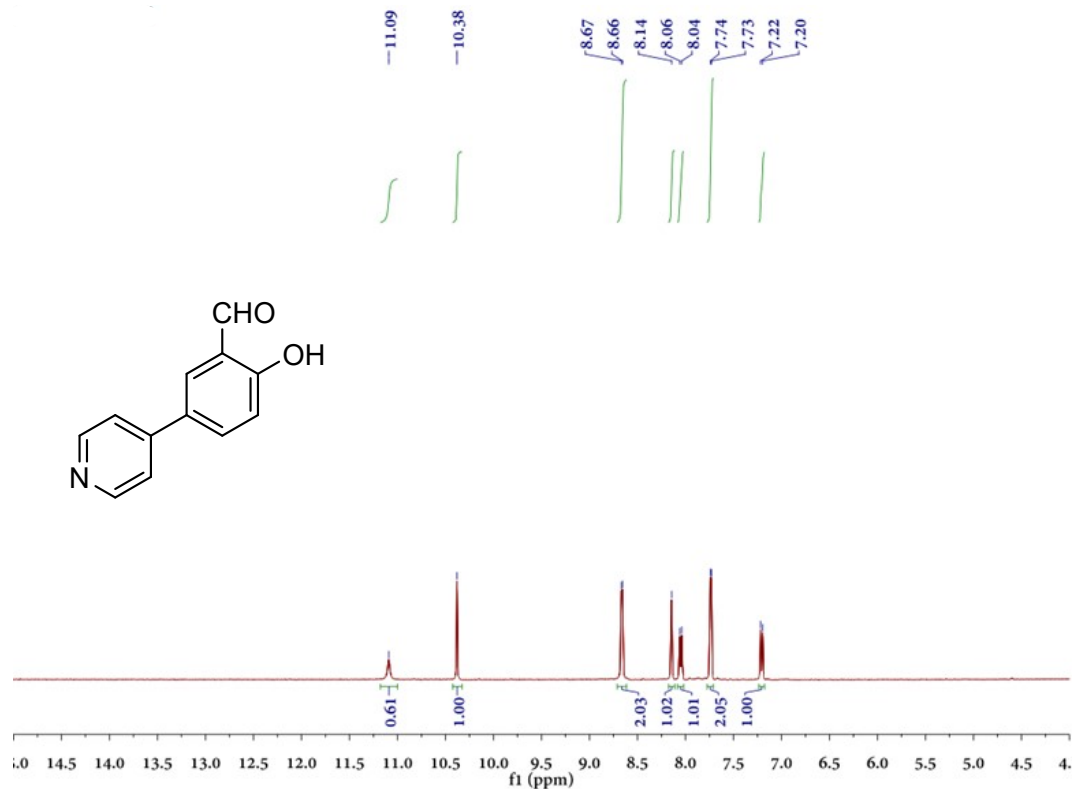

Fig. S1 <sup>1</sup>H NMR spectra of compound 1 in DMSO-d<sub>6</sub>.

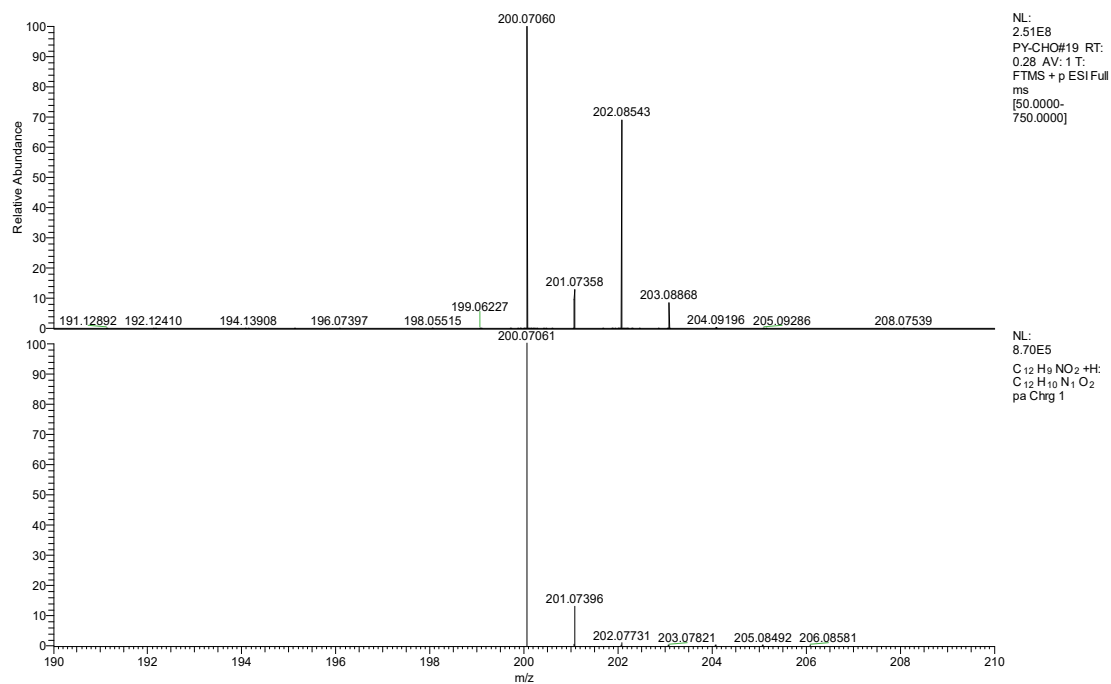

Fig. S2 (a) ESI-mass spectrum of compound 1 (C<sub>12</sub>H<sub>9</sub>NO<sub>2</sub>). (b) The simulation pattern of [H(C<sub>12</sub>H<sub>9</sub>NO<sub>2</sub>)]<sup>+</sup>.

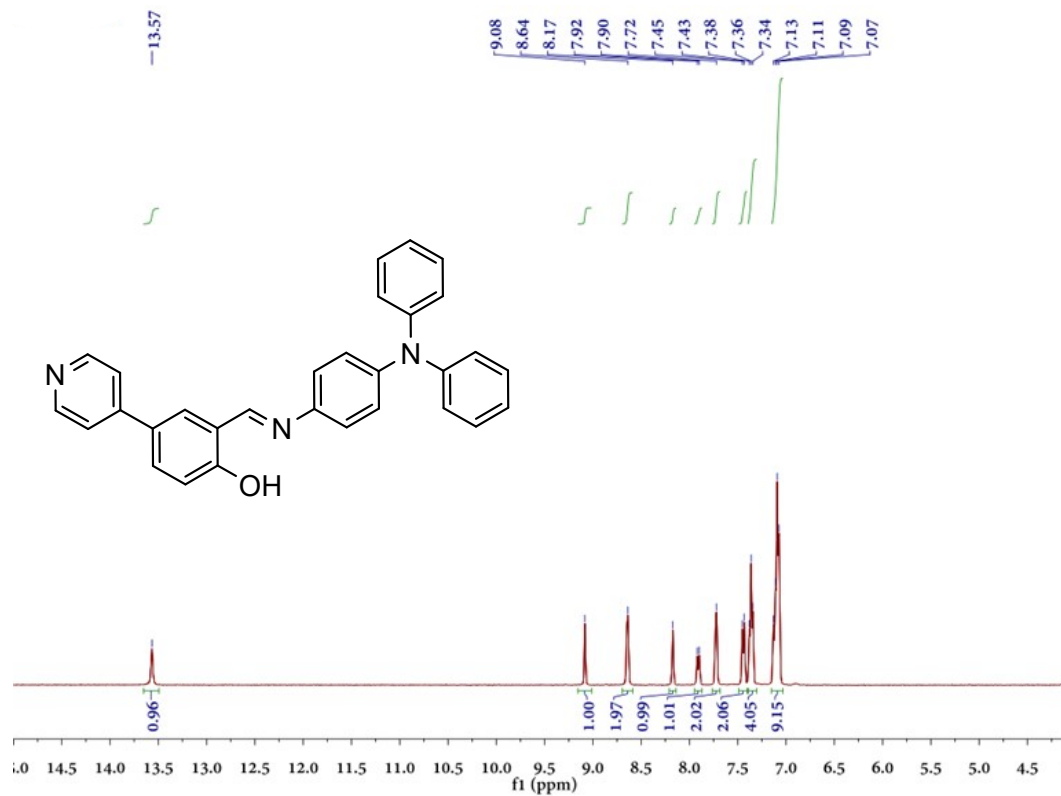

Fig. S3 <sup>1</sup>H NMR spectra of HL in DMSO-d<sub>6</sub>.

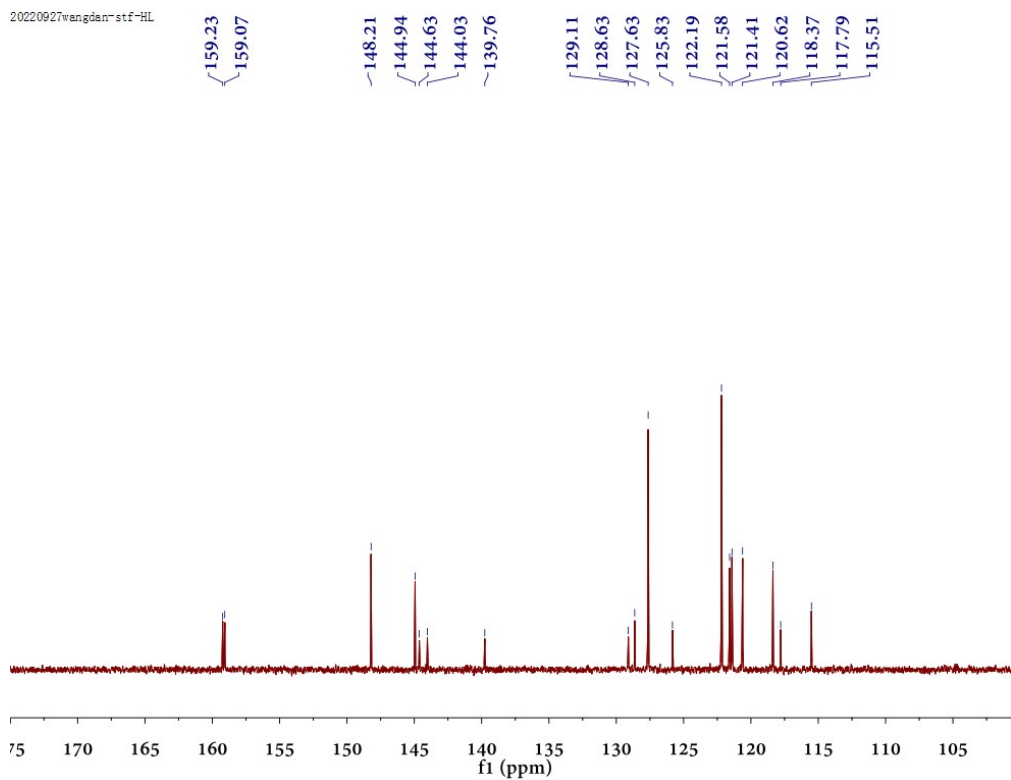

Fig. S4 <sup>13</sup>C NMR spectra of HL in DMSO-d<sub>6</sub>.

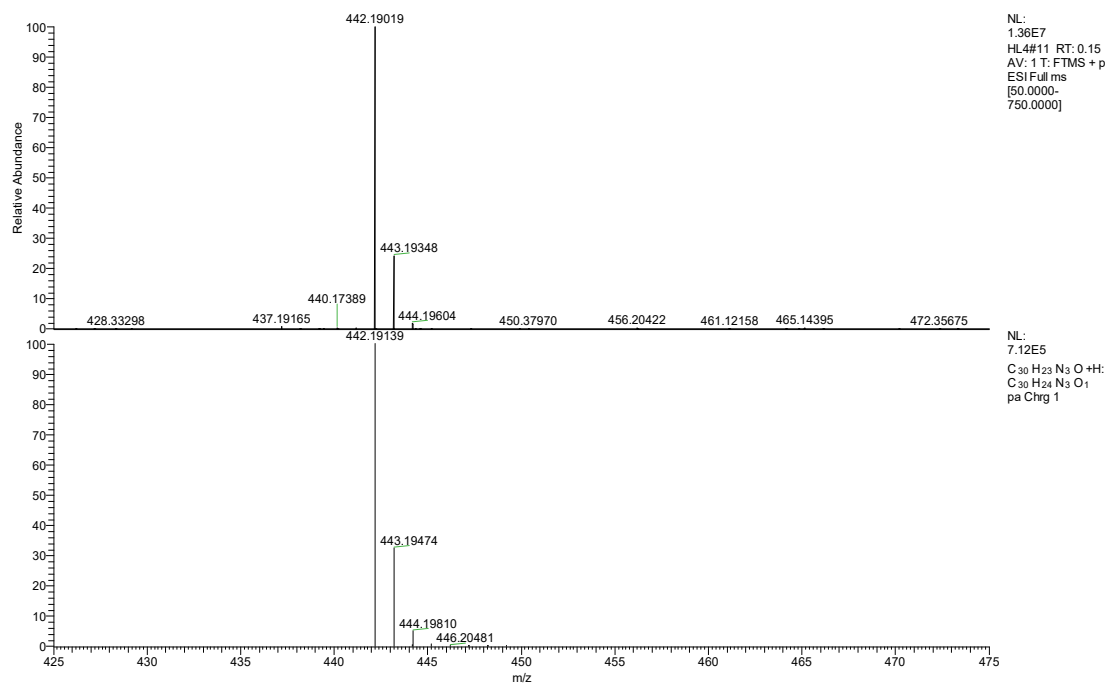

**Fig. S5** (a) ESI-mass spectrum of **HL** (C<sub>30</sub>H<sub>23</sub>N<sub>3</sub>O). (b) The simulation pattern of [H(C<sub>30</sub>H<sub>23</sub>N<sub>3</sub>O)]<sup>+</sup>.

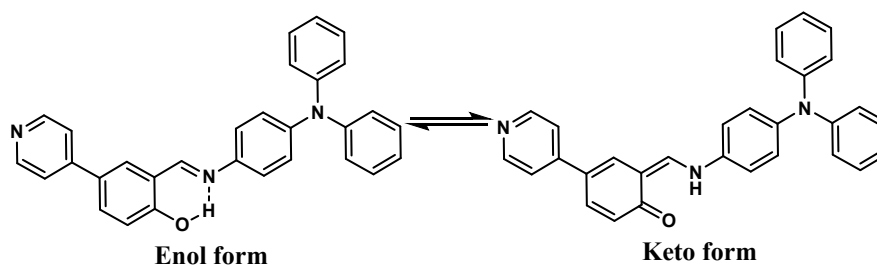

**Scheme S2** The ESIP process in **HL**.

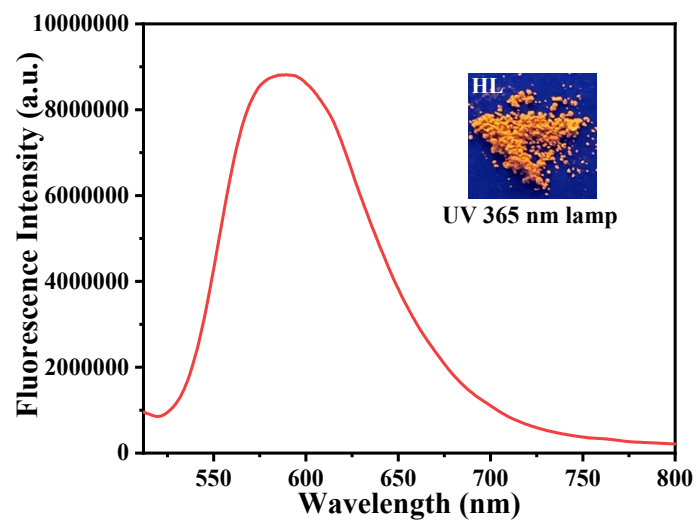

**Fig. S6** Fluorescence emission spectrum of **HL** in the solid state,  $\lambda_{\text{ex}} = 465$  nm. Inset: Fluorescence photograph of **HL** in the solid state under 365 nm UV lamp.

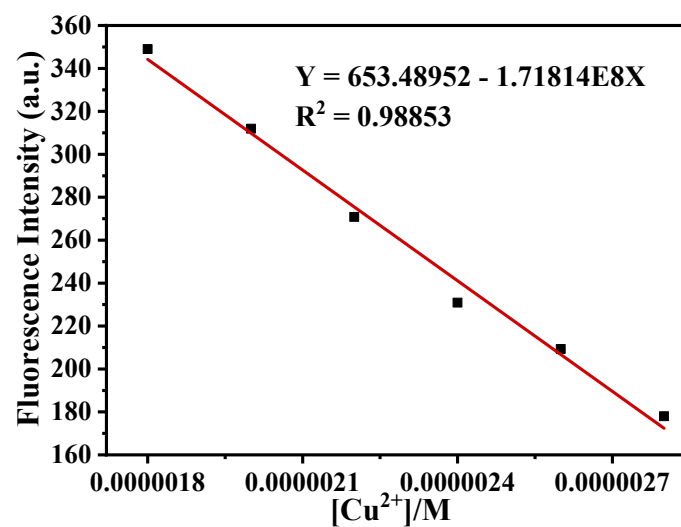

Fig. S7 Determination of detection limit of **HL** for  $Cu^{2+}$  by fluorescence titration experiment.

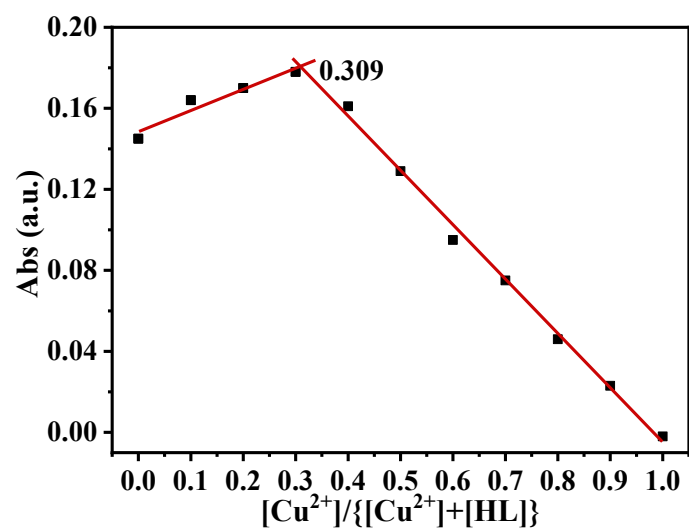

Fig. S8 Job's plot of  $Cu^{2+}$  vs **HL** in THF/ $H_2O$  (1/9, v/v) based on the absorbance at 343 nm.

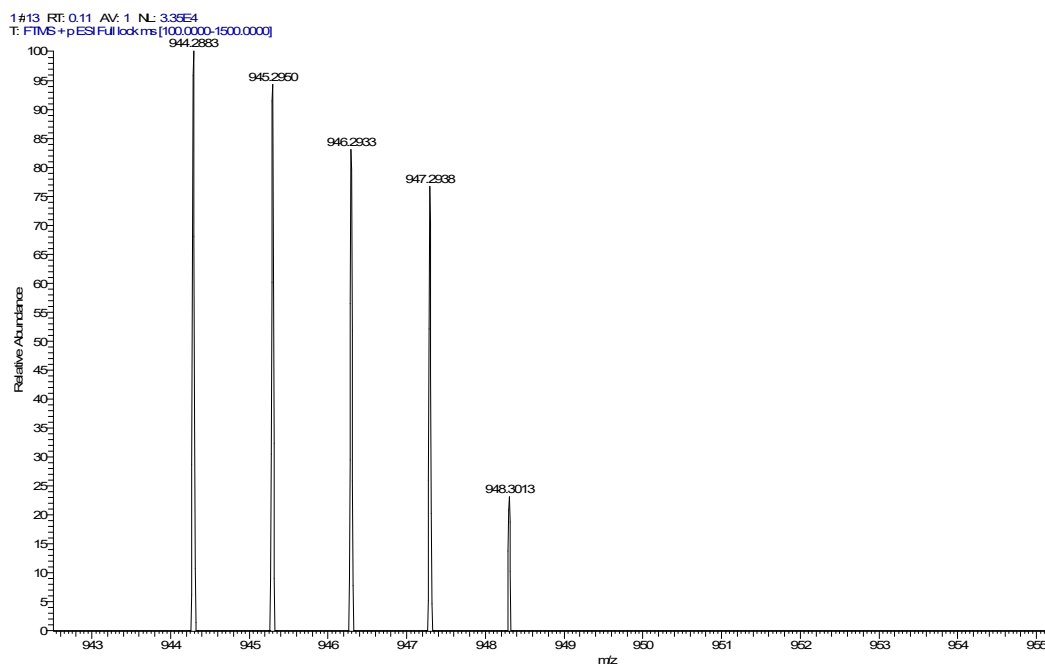

**Fig. S9** ESI-HRMS of HL upon the addition of 0.5 equiv. Cu<sup>2+</sup> in THF.

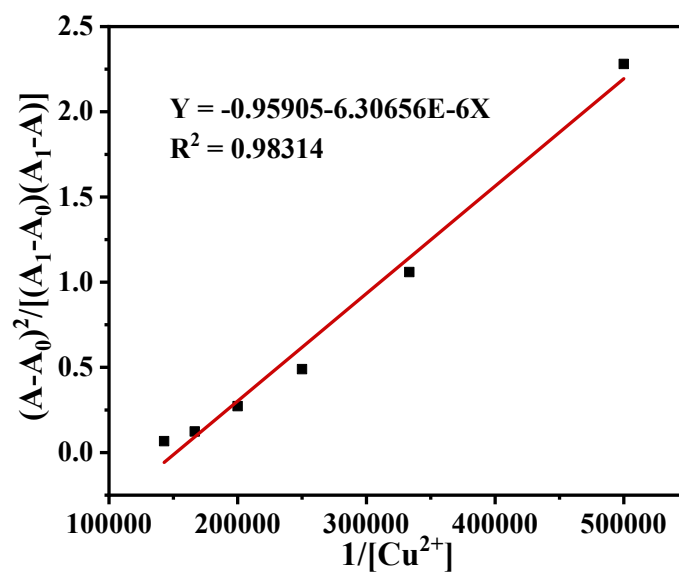

**Fig. S10** Association constant calculations by plotting  $(A-A_0)^2 / [(A_1-A_0)(A_1-A)]$  vs  $1/[Cu^{2+}]$  with linear fitting as well to find out the binding constant of CuL<sub>2</sub>, where A = absorbance at 343 nm at any given concentration of Cu<sup>2+</sup>, A<sub>0</sub> = absorbance maxima at 343 nm in presence of Cu<sup>2+</sup>, and A<sub>1</sub> = absorbance maxima at 343 nm in the absence of Cu<sup>2+</sup>.



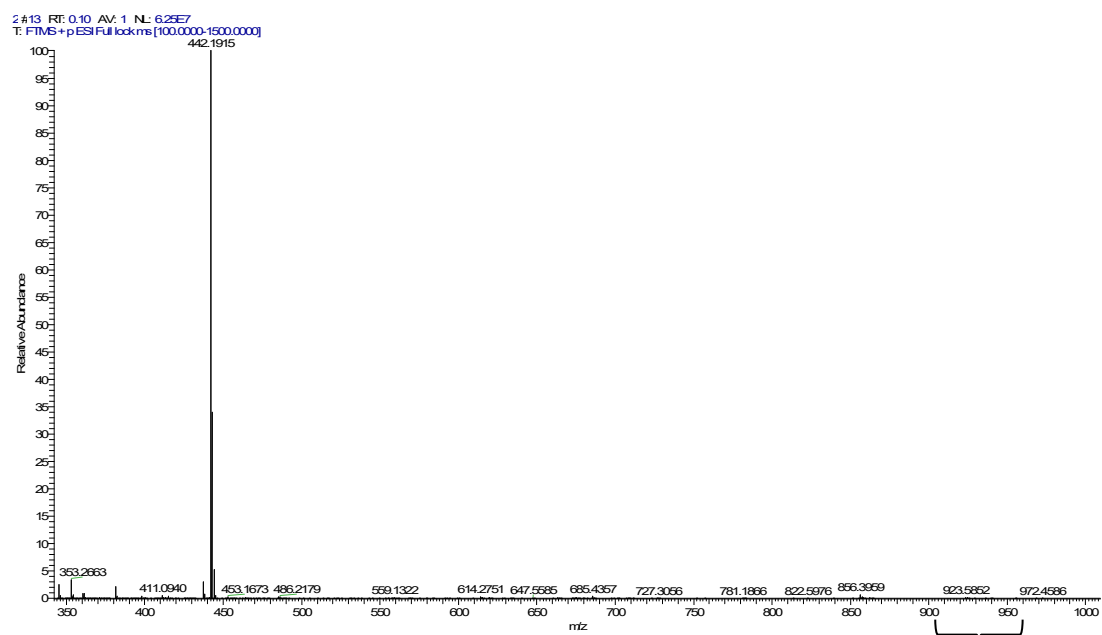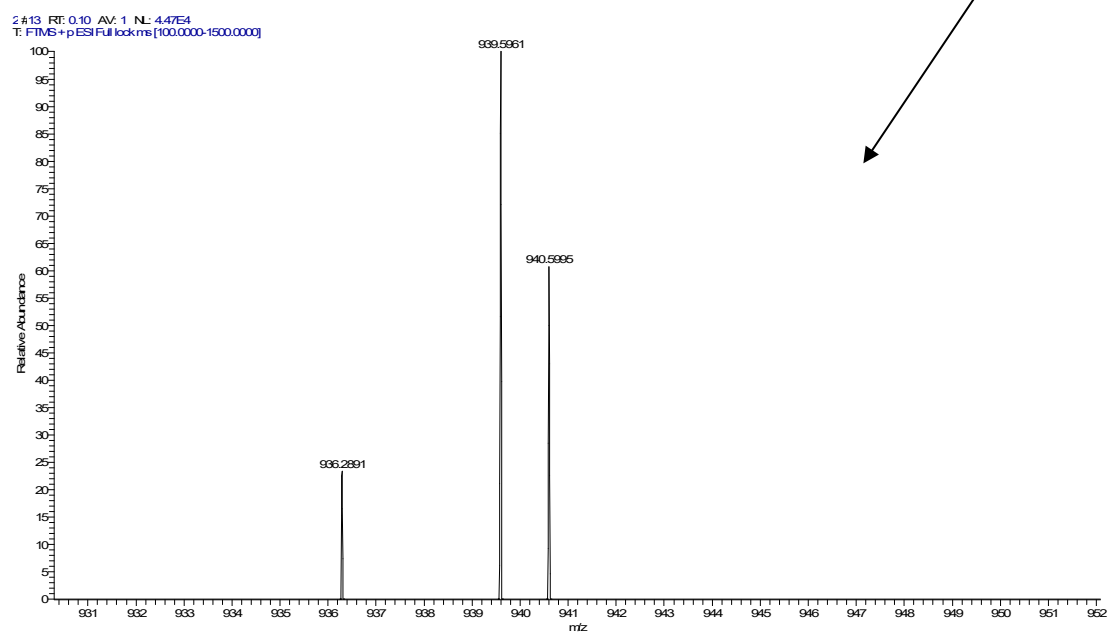

**Fig. S11** ESI-HRMS of  $\text{CuL}_2$  upon the addition of 8.0 equiv. His in THF.

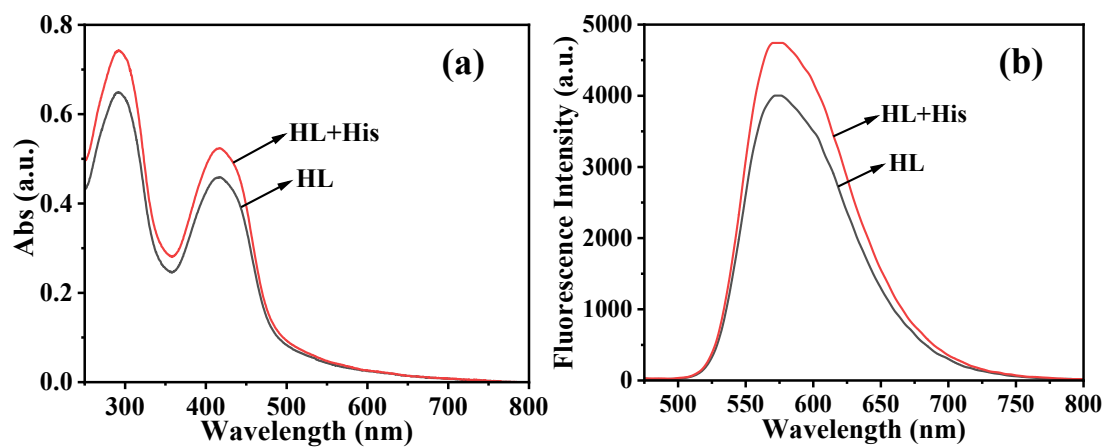

**Fig. S12** UV-Vis (a) and fluorescence (b) spectra of **HL** (20  $\mu$ M) and **HL** (20  $\mu$ M)+4.0 equiv. His in THF/H<sub>2</sub>O (1:9, v/v).

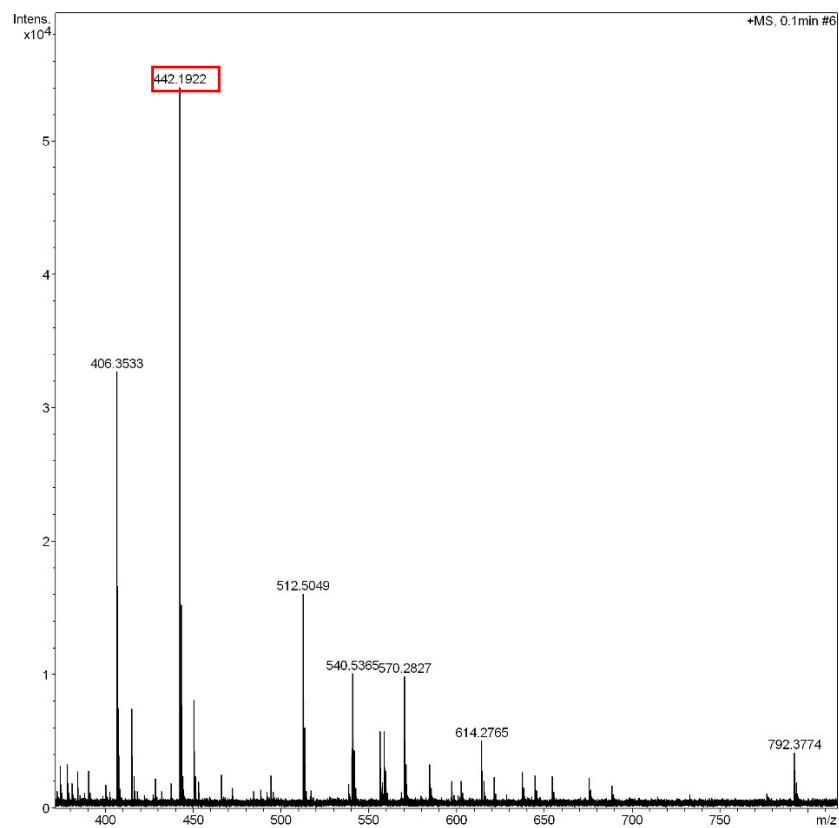

**Fig. S13** ESI-HRMS of **HL**+His in THF/H<sub>2</sub>O.

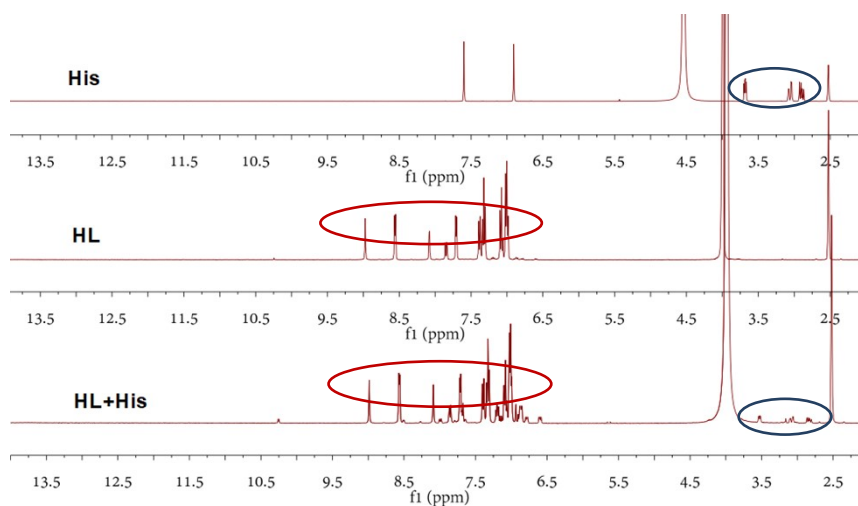

Fig. S14  $^1\text{H}$  NMR spectra of HL, His and HL+His in  $\text{DMSO-}d_6/\text{D}_2\text{O}$ .

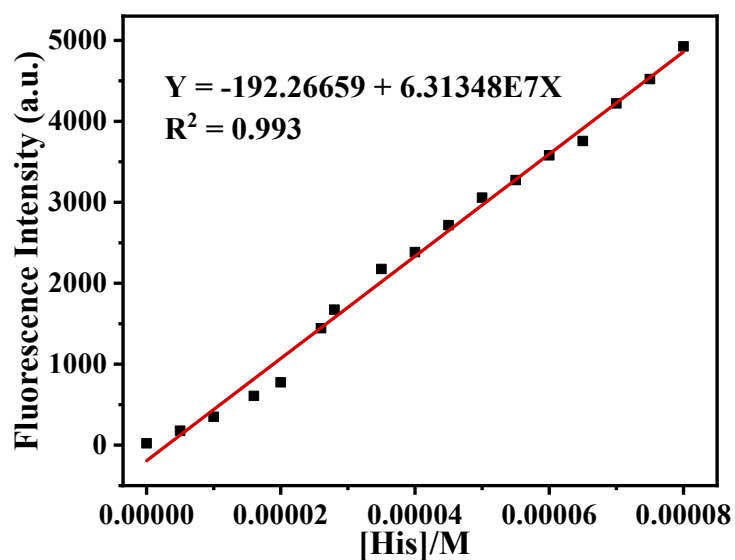

Fig. S15 Determination of detection limit of  $\text{CuL}_2$  for His by fluorescence titration experiment.

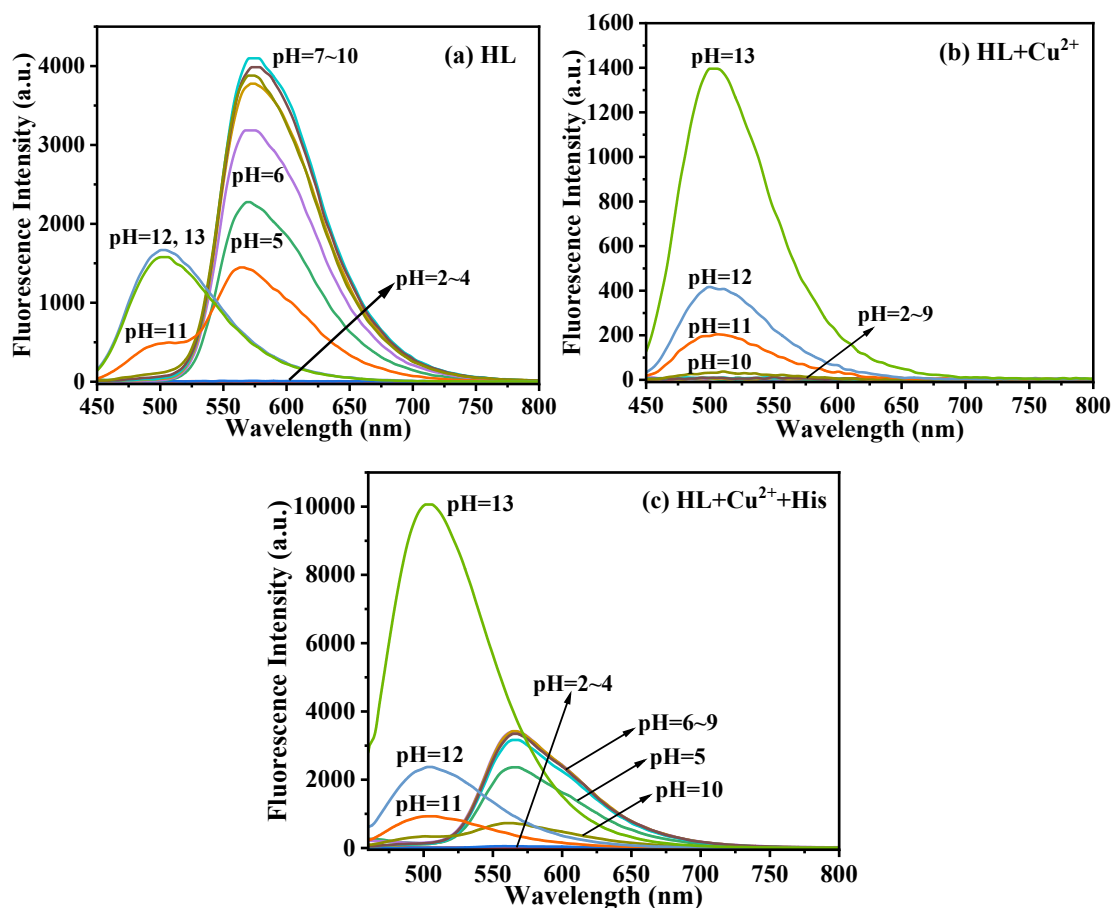

**Fig. S16** Fluorescence spectra of **HL** (a), **HL+Cu<sup>2+</sup>** (b) and **HL+Cu<sup>2+</sup>+His** (c) in THF/H<sub>2</sub>O (1:9, v/v) with different pH values,  $\lambda_{\text{ex}} = 420$  nm.

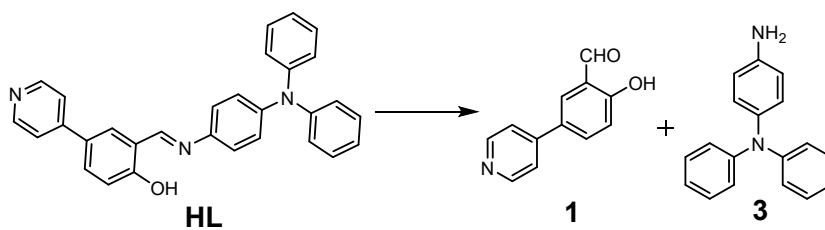

**Scheme S3** The possible hydrolysis of **HL**.

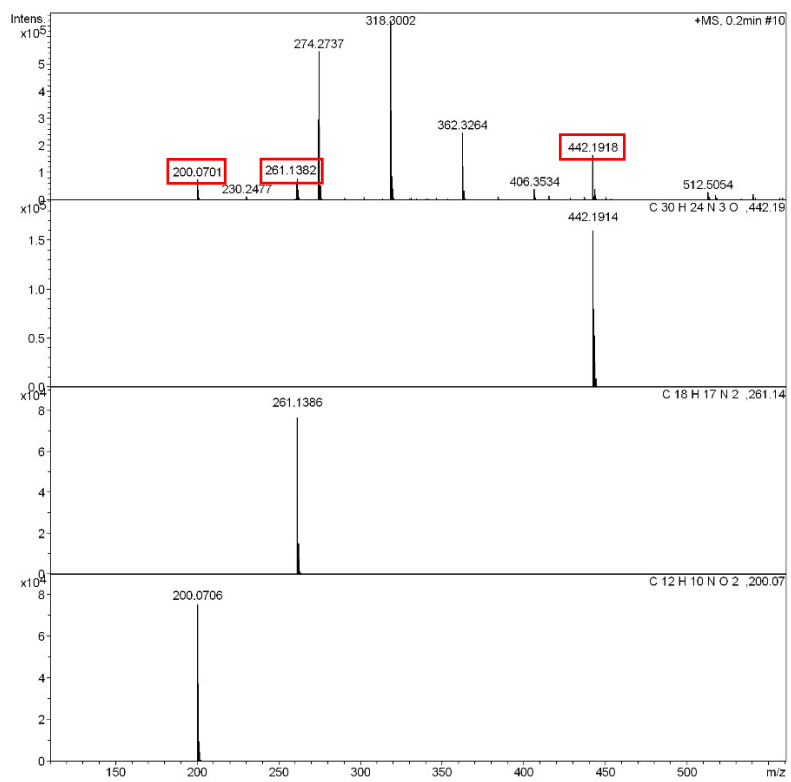

(a)

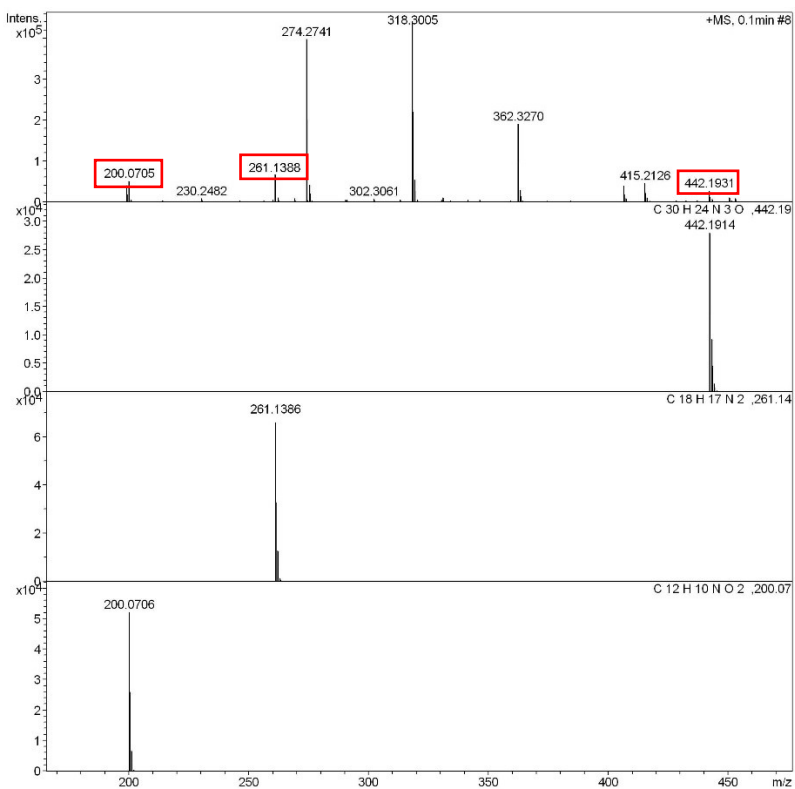

(b)

Fig. S17 ESI-HRMS of HL in THF/H<sub>2</sub>O with pH values of 10 (a) and 13 (b).

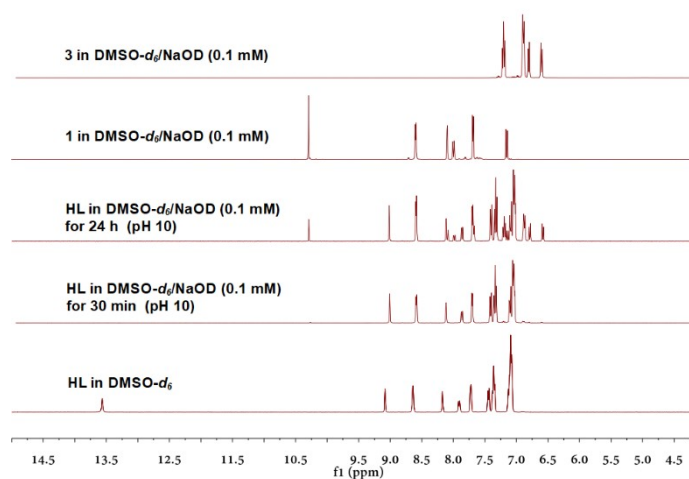

(a)

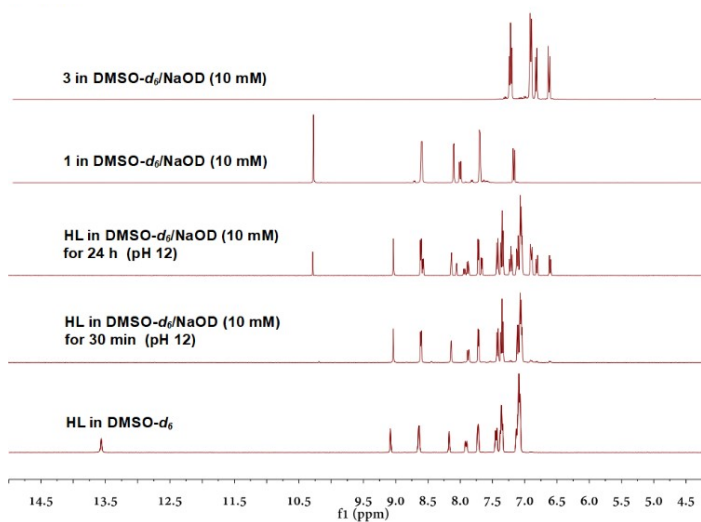

(b)

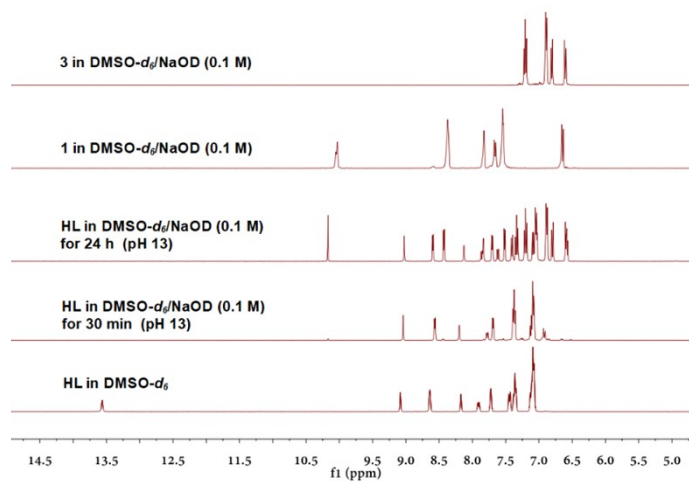

(c)

**Fig. S18**  $^1\text{H}$  NMR of HL in DMSO- $d_6$ /D $_2$ O with NaOD concentrations of 0.1 mM (pH 10) (a), 10 mM (pH 12) (b) and 0.1 M (pH 13) (c).

**Table S1** Performance of **HL** compared with recent reported fluorescence probes for Cu<sup>2+</sup> and His.

| Refs. | Probe                                                                               | Analyte          | Response Mode | Detection Media                                 | Emission Wavelength | Detection Limit            | Test Strips | Cell Imaging | pH   |
|-------|-------------------------------------------------------------------------------------|------------------|---------------|-------------------------------------------------|---------------------|----------------------------|-------------|--------------|------|
| 13    | 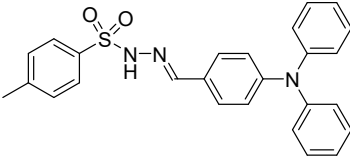   | Cu <sup>2+</sup> | Turn-off      | ACN/H <sub>2</sub> O,<br>(7:3, v/v),<br>pH=7.00 | 495 nm              | 1.25 × 10 <sup>-8</sup> M  | —           | —            | 3-8  |
| 14    |    | Cu <sup>2+</sup> | Ratiometric   | DMF/H <sub>2</sub> O,<br>(2:8, v/v)             | 318 nm              | 2.13 × 10 <sup>-9</sup> M  | Yes         | —            | 4-10 |
| 15    |    | Cu <sup>2+</sup> | on-off        | H <sub>2</sub> O/THF<br>(4:1, v/v)              | 525 nm              | 1.49 × 10 <sup>-7</sup> M  | Yes         | —            | 5-10 |
| 16    |  | Cu <sup>2+</sup> | colorimetric  | THF /EtOH                                       | 428 nm              | 0.273 × 10 <sup>-6</sup> M | —           | Yes          | —    |
| 17    |  | Cu <sup>2+</sup> | turn-on       | HEPES/EtOH,<br>(v/v = 1/1),<br>pH=7.4,          | 784 nm              | 1.24 × 10 <sup>-7</sup> M  | —           | Yes          | 4-9  |
| 18    |  | Cu <sup>2+</sup> | on-off        | DMSO                                            | 360 nm              | —                          | —           | Yes          | —    |
| 19    |  | Cu <sup>2+</sup> | on-off        | THF/H <sub>2</sub> O<br>(1:1, v/v)              | 598 nm              | 2 × 10 <sup>-7</sup> M     | Yes         | —            | —    |

|    |                                                                                     |                           |              |                                                                                                 |        |                                                             |   |     |                |
|----|-------------------------------------------------------------------------------------|---------------------------|--------------|-------------------------------------------------------------------------------------------------|--------|-------------------------------------------------------------|---|-----|----------------|
| 20 | 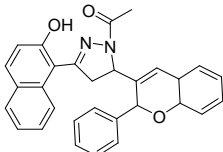   | Cu <sup>2+</sup>          | on-off       | EtOH/H <sub>2</sub> O<br>(1:1, v/v),<br>(HEPES=10<br>mM, pH=7.4)                                | 417 nm | $8.85 \times 10^{-7}$ M                                     | — | Yes | 7.4            |
| 21 |    | Cu <sup>2+</sup>          | on-off       | THF/H <sub>2</sub> O<br>(4:1, v/v), 2.00<br>$\times 10^{-3}$ M Tris-<br>HCl buffer,<br>pH=7.00) | 598 nm | $2.687 \times 10^{-7}$ M                                    | — | —   | 3-11           |
| 22 |    | Cu <sup>2+</sup>          | on-off       | HEPES/CH <sub>3</sub> C<br>N (0.5:9.5, v/v,<br>10 mM<br>HEPES buffer,<br>pH=7.4)                | 546 nm | $2.9 \times 10^{-10}$ M                                     | — | Yes | 4-8            |
| 23 |   | Cu <sup>2+</sup>          | on-off       | H <sub>2</sub> O                                                                                | 402 nm | $2.7 \times 10^{-9}$ M                                      | — | Yes | 4.85-<br>11.24 |
| 24 |  | Cu <sup>2+</sup>          | colorimetric | DMSO/H <sub>2</sub> O<br>(7:3, v/v), 5<br>mM NaAc-<br>HAc ,<br>pH=7.0                           | 520 nm | $1.2 \times 10^{-7}$ M                                      | — | —   |                |
| 25 |  | Cu <sup>2+</sup>          | on-off       | THF/H <sub>2</sub> O<br>(4:1, v/v),<br>pH = 7.0                                                 | 598 nm | $2.36 \times 10^{-7}$ M                                     | — | —   | 2-11           |
| 26 |  | Cu <sup>2+</sup> ,<br>His | on-off-on    | DMSO/H <sub>2</sub> O<br>(1:1, v/v)                                                             | 410 nm | $14 - 18 \times 10^{-7}$<br>M,<br>$6 - 11 \times 10^{-7}$ M | — | —   | 6-7            |
| 27 |  | His                       | colorimetric | H <sub>2</sub> O (0.01 M<br>HEPES buffer,<br>pH=7.4)                                            | 443 nm | $8.5 \times 10^{-8}$ M,<br>$1.9 \times 10^{-7}$ M           | — | —   | —              |



|           |                                                                                     |                           |           |                                                  |        |                                                     |     |     |              |
|-----------|-------------------------------------------------------------------------------------|---------------------------|-----------|--------------------------------------------------|--------|-----------------------------------------------------|-----|-----|--------------|
|           | 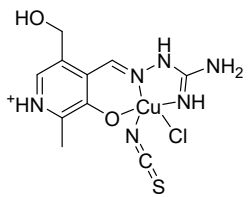   |                           |           |                                                  |        |                                                     |     |     |              |
| 28        |    | His                       | on-off-on | H <sub>2</sub> O<br>/acetonitrile<br>(99:1, v/v) | 395 nm | $7.64 \times 10^{-6}$ M                             | —   | —   | —            |
| 29        |    | His                       | off-on    | iPrOH /MeOH<br>(99/1, v/v)                       | 365 nm | $7.03 \times 10^{-8}$ M                             | —   | —   | —            |
| 30        |   | Cu <sup>2+</sup> ,<br>His | on-off-on | HEPES<br>buffer (10 mM,<br>pH=7.4)               | 610 nm | $0.04 \times 10^{-6}$ M,<br>$1.4 \times 10^{-6}$ M  | —   | Yes | 2-12         |
| 31        |  | His                       | off-on    | DMSO,<br>0.01 M PB<br>(pH=7.4)                   | 473 nm | $1 \times 10^{-7}$ M                                | —   | —   | —            |
| 32        | Cu-MOFs/Fe <sup>3+</sup>                                                            | His                       | turn-on   | H <sub>2</sub> O                                 | 430 nm | $1.56 \times 10^{-7}$ M                             | —   | —   | —            |
| 33        |  | Cu <sup>2+</sup> ,<br>His | on-off-on | DOPC                                             | 513 nm | $2.4 \times 10^{-8}$ M,<br>$5.4 \times 10^{-8}$ M   | Yes | —   | —            |
| This work |  | Cu <sup>2+</sup> ,<br>His | on-off-on | THF/H <sub>2</sub> O<br>(1:9, v/v)               | 560 nm | $1.32 \times 10^{-7}$ M,<br>$5.14 \times 10^{-8}$ M | Yes | Yes | 5-10,<br>5-9 |

**Table S2** Crystal data and structure refinement for **HL** and **ZnL<sub>2</sub>**.

| Identification code | <b>HL</b>                                        | <b>ZnL<sub>2</sub></b>                                           |
|---------------------|--------------------------------------------------|------------------------------------------------------------------|
| Empirical formula   | C <sub>30</sub> H <sub>23</sub> N <sub>3</sub> O | C <sub>60</sub> H <sub>44</sub> N <sub>6</sub> O <sub>2</sub> Zn |
| Formula weight      | 441.51                                           | 946.38                                                           |
| Crystal system      | Monoclinic                                       | Triclinic                                                        |

|                                             |                                                               |                                                               |
|---------------------------------------------|---------------------------------------------------------------|---------------------------------------------------------------|
| Space group                                 | P2 <sub>1</sub> /n                                            | $\bar{p}1$                                                    |
| a/Å                                         | 15.6216(9)                                                    | 11.9862(10)                                                   |
| b/Å                                         | 9.9838(5)                                                     | 14.4619(13)                                                   |
| c/Å                                         | 16.1858(9)                                                    | 15.5093(13)                                                   |
| $\alpha$ /°                                 | 90                                                            | 85.024(2)                                                     |
| $\beta$ /°                                  | 113.984(2)                                                    | 72.211(2)                                                     |
| $\gamma$ /°                                 | 90                                                            | 74.526(2)                                                     |
| Volume/Å <sup>3</sup>                       | 2306.4(2)                                                     | 2467.1(4)                                                     |
| Z                                           | 4                                                             | 2                                                             |
| $\rho_{\text{calc}}/\text{cm}^3$            | 1.271                                                         | 1.274                                                         |
| $\mu/\text{mm}^{-1}$                        | 0.078                                                         | 0.548                                                         |
| F(000)                                      | 928.0                                                         | 984.0                                                         |
| Index ranges                                | -18 ≤ h ≤ 20, -13 ≤ k ≤ 13, -21 ≤ l ≤ 21                      | -14 ≤ h ≤ 9, -17 ≤ k ≤ 17, -18 ≤ l ≤ 18                       |
| Reflections collected                       | 22181                                                         | 18149                                                         |
| Independent reflections                     | 5607 [R <sub>int</sub> = 0.0453, R <sub>sigma</sub> = 0.0404] | 8416 [R <sub>int</sub> = 0.0352, R <sub>sigma</sub> = 0.0473] |
| Data/restraints/parameters                  | 5607/0/308                                                    | 8416/87/677                                                   |
| Goodness-of-fit on F <sup>2</sup>           | 1.045                                                         | 1.055                                                         |
| Final R indexes [I ≥ 2σ (I)]                | R <sub>1</sub> = 0.0613, wR <sub>2</sub> = 0.1613             | R <sub>1</sub> = 0.0482, wR <sub>2</sub> = 0.1218             |
| Final R indexes [all data]                  | R <sub>1</sub> = 0.0899, wR <sub>2</sub> = 0.1809             | R <sub>1</sub> = 0.0615, wR <sub>2</sub> = 0.1339             |
| Largest diff. peak/hole / e Å <sup>-3</sup> | 0.21/-0.14                                                    | 0.49/-0.37                                                    |
| CCDC number                                 | 2211845                                                       | 2211846                                                       |

$$R_1 = \sum(|F_o| - |F_c|)/\sum|F_o|; wR_2 = \{\sum[(w|F_o|^2 - |F_c|^2)^2/\sum w(F_o^2)]\}^{1/2}.$$

**Table S3** Selected bond distances (Å) and angles (deg) for **HL** and **ZnL<sub>2</sub>**.

| <b>HL</b> |            |         |          |
|-----------|------------|---------|----------|
| O1-C21    | 1.343(2)   | C26-C30 | 1.383(2) |
| N1-C19    | 1.275(2)   | C26-C27 | 1.383(3) |
| N1-C16    | 1.4177(19) | C12-C11 | 1.374(3) |
| N2-C13    | 1.433(2)   | C12-C7  | 1.380(3) |
| N2-C6     | 1.398(2)   | C21-C22 | 1.395(2) |
| N2-C12    | 1.417(2)   | C16-C17 | 1.372(2) |
| C20-C25   | 1.386(2)   | C16-C15 | 1.389(3) |
| C20-C19   | 1.456(2)   | C18-C17 | 1.385(2) |
| C20-C21   | 1.401(2)   | C11-C10 | 1.370(3) |
| C24-C25   | 1.390(2)   | C14-C15 | 1.383(2) |
| C24-C26   | 1.478(2)   | C23-C22 | 1.368(3) |
| C24-C23   | 1.391(2)   | C2-C3   | 1.379(3) |
| C13-C18   | 1.373(3)   | C3-C4   | 1.357(3) |
| C13-C14   | 1.374(3)   | C5-C4   | 1.373(3) |
| N3-C29    | 1.323(3)   | C10-C9  | 1.364(4) |
| N3-C28    | 1.321(3)   | C7-C8   | 1.378(3) |

|                        |            |             |            |
|------------------------|------------|-------------|------------|
| C6-C1                  | 1.379(3)   | C30-C29     | 1.376(3)   |
| C6-C5                  | 1.394(2)   | C27-C28     | 1.374(3)   |
| C1-C2                  | 1.377(3)   | C9-C8       | 1.363(4)   |
| C19-N1-C16             | 121.95(15) | O1-C21-C20  | 121.95(15) |
| C6-N2-C13              | 120.09(14) | O1-C21-C22  | 119.57(17) |
| C6-N2-C12              | 122.44(14) | C22-C21-C20 | 118.48(17) |
| C12-N2-C13             | 117.39(14) | C17-C16-N1  | 116.64(15) |
| C25-C20-C19            | 119.17(15) | C17-C16-C15 | 118.33(15) |
| C25-C20-C21            | 119.24(15) | C15-C16-N1  | 125.03(16) |
| C21-C20-C19            | 121.59(16) | C13-C18-C17 | 120.48(18) |
| C25-C24-C26            | 120.93(15) | C10-C11-C12 | 120.8(2)   |
| C25-C24-C23            | 116.83(16) | C13-C14-C15 | 120.62(18) |
| C23-C24-C26            | 122.23(14) | C16-C17-C18 | 120.98(17) |
| C18-C13-N2             | 120.18(17) | C22-C23-C24 | 121.96(15) |
| C18-C13-C14            | 119.03(16) | C14-C15-C16 | 120.52(18) |
| C14-C13-N2             | 120.77(17) | C1-C2-C3    | 120.6(2)   |
| C28-N3-C29             | 114.68(19) | C4-C3-C2    | 119.1(2)   |
| C1-C6-N2               | 120.83(16) | C4-C5-C6    | 120.6(2)   |
| C1-C6-C5               | 117.98(17) | C3-C4-C5    | 121.1(2)   |
| C5-C6-N2               | 121.19(17) | C9-C10-C11  | 120.3(2)   |
| C2-C1-C6               | 120.68(19) | C8-C7-C12   | 119.4(2)   |
| C20-C25-C24            | 122.63(16) | C23-C22-C21 | 120.85(17) |
| C30-C26-C24            | 123.40(16) | C29-C30-C26 | 120.1(2)   |
| C30-C26-C27            | 114.91(18) | C28-C27-C26 | 120.56(19) |
| C27-C26-C24            | 121.69(15) | C8-C9-C10   | 119.1(2)   |
| C11-C12-N2             | 119.48(18) | N3-C29-C30  | 125.0(2)   |
| C11-C12-C7             | 118.88(19) | N3-C28-C27  | 124.6(2)   |
| C7-C12-N2              | 121.64(18) | C9-C8-C7    | 121.3(2)   |
| N1-C19-C20             | 122.00(16) |             |            |
| <b>ZnL<sub>2</sub></b> |            |             |            |
| N1-Zn1                 | 2.007(2)   | O1-Zn1      | 1.919(2)   |
| N4-Zn1                 | 2.018(2)   | O2-Zn1      | 1.920(2)   |
| C16-N1-Zn1             | 121.97(19) | C19-N1-Zn1  | 119.1(2)   |
| C46-N4-Zn1             | 121.46(19) | C49-N4-Zn1  | 119.4(2)   |
| C25-O1-Zn1             | 124.9(2)   | C51-O2-Zn1  | 124.77(19) |
| N1-Zn1-N4              | 125.33(10) | O1-Zn1-N1   | 97.47(10)  |
| O1-Zn1-N4              | 109.34(10) | O1-Zn1-O2   | 116.57(10) |
| O2-Zn1-N1              | 112.68(9)  | O2-Zn1-N4   | 96.75(9)   |

## References

1. S. J. Yeh, C. Y. Tsai, C.-Y. Huang, G.-S. Liou and S.-H. Cheng, *Electrochem. Commun.*, 2003, **5**,

373-377.

2. H. Tan, H. Yu, H. Yao, Y. Song, S. Zhu, N. Song, K. Shi, B. Zhang and S. Guan, *Dyes Pigm.*, 2018, **151**, 179-186.
3. M. J. Frisch, G. W. Trucks, H. B. Schlegel, G. E. Scuseria, M. A. Robb, J. R. Cheeseman, G. Scalmani, V. Barone, B. Mennucci, G. A. Petersson, H. Nakatsuji, M. Caricato, X. Li, H. P. Hratchian, A. F. Izmaylov, J. Bloino, G. Zheng, J. L. Sonnenberg, M. Hada, M. Ehara, K. Toyota, R. Fukuda, J. Hasegawa, M. Ishida, T. Nakajima, Y. Honda, O. Kitao, H. Nakai, T. Vreven, J. A. Montgomery Jr., J. E. Peralta, F. Ogliaro, M. Bearpark, J. J. Heyd, E. Brothers, K. N. Kudin, V. N. Staroverov, R. Kobayashi, J. Normand, K. Raghavachari, A. Rendell, J. C. Burant, S. S. Iyengar, J. Tomasi, M. Cossi, N. Rega, J. M. Millam, M. Klene, J. E. Knox, J. B. Cross, V. Bakken, C. Adamo, J. Jaramillo, R. Gomperts, R. E. Stratmann, O. Yazyev, A. J. Austin, R. Cammi, C. Pomelli, J. W. Ochterski, R. L. Martin, K. Morokuma, V. G. Zakrzewski, G. A. Voth, P. Salvador, J. J. Dannenberg, S. Dapprich, A. D. Daniels, O. Farkas, J. B. Foresman, J. V. Ortiz, J. Cioslowski and D. J. Fox, *Journal*, 2009.
4. C. Adamo and V. Barone, *J. Chem. Phys.*, 1999, **110**, 6158-6170.
5. F. Weigend and R. Ahlrichs, *Phys. Chem. Chem. Phys.*, 2005, **7**, 3297-3305.
6. F. Weigend, *Phys. Chem. Chem. Phys.*, 2006, **8**, 1057-1065.
7. S. Grimme, S. Ehrlich and L. Goerigk, *J. Comput. Chem.*, 2011, **32**, 1456-1465.
8. A. V. Marenich, C. J. Cramer and D. G. Truhlar, *J. Phys. Chem. B*, 2009, **113**, 6378-6396.
9. T. Lu and F. Chen, *J. Comput. Chem.*, 2012, **33**, 580-592.
10. W. Humphrey, A. Dalke and K. Schulten, *J. Mol. Graphics*, 1996, **14**, 33-38.
11. A. Schaefer, H. Horn and R. Ahlrichs, *J. Chem. Phys.*, 1992, **97**, 2571-2577.
12. A. Schaefer, C. Huber and R. Ahlrichs, *J. Chem. Phys.*, 1994, **100**, 5829-5835.
13. D. Mohanasundaram, R. Bhaskar, N. Lenin, K. Nehru, G. Rajagopal, G. G. V. Kumar and J. Rajesh, *Journal of Photochemistry and Photobiology A: Chemistry*, 2022, **427**, 113850.
14. S. Majeed, T. A. Khan, M. T. Waseem, H. M. Junaid, A. M. Khan and S. A. Shahzad, *Journal of Photochemistry and Photobiology A: Chemistry*, 2022, **431**, 114062.
15. Y. Lin, A. Yu, J. Wang, D. Kong, H. Liu, J. Li and C. Jia, *RSC Advances*, 2022, **12**, 16772-16778.
16. R. Kouser, A. Rehman, S. M. A. Abidi, F. Arjmand and S. Tabassum, *Journal of Molecular Structure*, 2022, **1256**, 132533.
17. T. Guo, R. Tian, W. Qu, B. Yang, Z. Geng and Z. Wang, *Dyes and Pigments*, 2022, **205**, 110483.
18. Z. Fang, D. Chen, J. Xu, S. Liu, G. Xu, X. Tian, J. Xuan, Y. Tian and Q. Zhang, *Sensors and Actuators B: Chemical*, 2022, **357**, 131423.
19. M. Zhu, S. Huang, M. Chen, Y. Li and M. Zhong, *Optical Materials*, 2022, **127**, 112288.
20. Y.-p. Zhang, Y.-c. Zhao, Q.-h. Xue, Y.-s. Yang, H.-C. Guo and J.-J. Xue, *Inorganic Chemistry Communications*, 2021, **129**, 108612.
21. X. Zhang, S.-T. Wu, X.-J. Yang, L.-Y. Shen, Y.-L. Huang, H. Xu, Q.-L. Zhang, T. Sun, C. Redshaw and X. Feng, *Inorg. Chem.*, 2021, **60**, 8581-8591.
22. H. Wang, P. Wang, L. Niu, C. Liu, Y. Xiao, Y. Tang and Y. Chen, *Spectrochimica Acta Part A: Molecular and Biomolecular Spectroscopy*, 2022, **278**, 121257.
23. H.-j. Yu, W. Zhao, Y. Zhou, G.-j. Cheng, M. Sun, L. Wang, L. Yu, S. H. Liang and C. Ran, *Analytica Chimica Acta*, 2020, **1097**, 144-152.
24. B. Wang, W. Xu, K. Gan, K. Xu, Q. Chen, W. Wei and W. Wu, *Spectrochimica Acta Part A: Molecular and Biomolecular Spectroscopy*, 2022, **277**, 121245.

25. H.-F. Xie, C.-J. Yu, Y.-L. Huang, H. Xu, Q.-L. Zhang, X.-H. Sun, X. Feng and C. Redshaw, *Mater. Chem. Front.*, 2020, **4**, 1500-1506.
26. B. Mohan, K. Modi, J. Parikh, S. Ma, S. Kumar, K. Kumar Manar, F. Sun, H. You and P. Ren, *Journal of Photochemistry and Photobiology A: Chemistry*, 2022, **422**, 113557.
27. M. Chakraborty, M. Mohanty, R. Dinda, S. Sengupta and S. Kumar Chattopadhyay, *Polyhedron*, 2022, **211**, 115554.
28. A. Pundi, C.-J. Chang, J. Chen, S.-R. Hsieh and M.-C. Lee, *Sens. Actuators, B*, 2021, **328**, 129084.
29. J. Tian, K. Lu, Y. Wang, Y. Chen, B. Huo, Y. Jiang, S. Yu, X. Yu and L. Pu, *Tetrahedron*, 2021, **95**, 132366.
30. Y. Yang, Y. Li, X. Zhi, Y. Xu and M. Li, *Dyes Pigm.*, 2020, **183**, 108690.
31. M. Zhang, M. Qian, H. Huang, Q. Gao, C. Zhang and H. Qi, *Journal of Electroanalytical Chemistry*, 2022, **920**, 116578.
32. C. Chu, R. Huang, X. Wang, Y. Deng, T. Gu, D. Huo, L. Zhang, D. Zhong and C. Hou, *Nano*, 2020, **16**, 2150015.
33. B. Maiti, N. Dey and S. Bhattacharya, *ACS Applied Bio Materials*, 2019, **2**, 2365-2373.
